# Supplementary material
Source: publisher site journal article supplement (https://www.dovepress.com/article/244903)
Supplement: Supplementary file 1 [file get_supplementary_file.php]

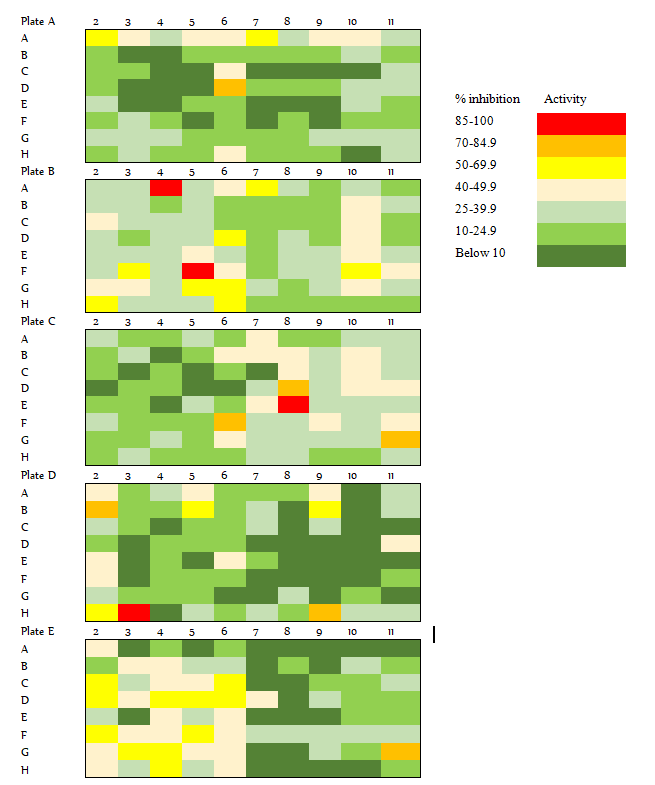


**Supplementary files Fig S01.**  Heat map of percent inhibition of pathogen box compounds against *Leishmania donovani* promastigotes*.* The color key shown for the range of inhibition observed by the compounds. Red color corresponds to highest inhibitions (more than 85%), while dark green colors correspond to lowest inhibition. The experiment was conducted using amphotericin B and Pentamidine as standard drugs to check susceptibility of the parasites. Two compounds (Plate A well D06 and Plate B well A04) were purposively omitted from further investigation. Plate A well D06 despite its considerable activity on the primary screening was failed to demonstrate a dose dependent inhibitory effect the subsequent dose titration assay. The other compound B-A04 (pentamidine) is a standard drug for leishmaniasis. The heat map was generated using the average activity values of compounds from each microplate well in two independent experiments conducted in triplicate.
